# Supplementary material for: Kallikrein family proteases KLK6 and KLK7 are potential early detection and diagnostic biomarkers for serous and papillary serous ovarian cancer subtypes
Source: Springer Nature journal article supplement (doi:10.1186/s13048-014-0109-z), 2014-12-01
Supplement: MOESM1 [file 9778504]

## OVARIAN CELL LINES

| Name      | Source                 | Morphology | Oncogene                  | Properties | Tumor Histology                     | REFERENCES |
|-----------|------------------------|------------|---------------------------|------------|-------------------------------------|------------|
| TOV21G    | ATCC                   | Epithelial | p53+ (WT)                 | Adherent   | adenocarcinoma                      | [31]       |
| TOV112D   | ATCC                   | Epithelial | her2/neu +, p53           | Adherent   | adenocarcinoma                      | [32]       |
| OV-90     | ATCC                   | Epithelial | her2/neu +, p53           | Adherent   | papillary serous adenocarcinoma     | [33]       |
| CAOV3     | ATCC                   | Epithelial | FAM123B,STK11, TP53       | Adherent   | adenocarcinoma                      | [34]       |
| SKOV3     | ATCC                   | Epithelial | MLH1, CDKN2A, TP53,PIK3CA | Adherent   | adenocarcinoma                      | [35]       |
| PA-1      | ATCC                   | Epithelial | N-ras + (activated)       | Adherent   | teratocarcinoma                     | [36]       |
| SW626     | ATCC                   | Epithelial | N/A                       | Adherent   | adenocarcinoma                      | [37]       |
| ES-2      | ATCC                   | Fibroblast | P glycoprotein            | Adherent   | clear cell carcinoma                | [38]       |
| SKOV-1    | Dr. Howell, UCSD       | Epithelial | N/A                       | Adherent   | clear cell carcinoma                | [39]       |
| IGROV-1   | Dr. Howell, UCSD       | Epithelial | N/A                       | Adherent   | adenocarcinoma                      | [40]       |
| HEY       | Dr Howell,UCSD         | Epithelial | KRAS+BRAF                 | Adherent   | papillary cystadenocarcinoma.       | [41]       |
| OV-2008   | Dr Howell,UCSD         | Epithelial | N/A                       | Adherent   | serous                              | [42]       |
| A2780     | Dr Howell,UCSD         | Epithelial | N/A                       | Adherent   | ovarian carcinoma                   | [43]       |
| UCI-101   | Dr. Carpenter, UCI     | Epithelial | p-glycoprotein, EGFR      | Adherent   | papillary adenocarcinoma            | [44]       |
| UCI-107   | Dr. Carpenter, UCI     | Epithelial | N/A                       | Adherent   | papillary adenocarcinoma            | [45]       |
| DOV13     | Dr. Bast, MD Anderson  | Epithelial | N/A                       | Adherent   | ovarian carcinoma                   | [46]       |
| CSOC882   | Dr. Karlan, UCLA       | Epithelial | EGFR, HER2,               | Adherent   | clear cell ovarian carcinoma (Gr 3) | [47]       |
| 2774      | Dr. Wolff, MD Anderson | Epithelial | N/A                       | Adherent   | Serous cystadenocarcinoma           | [48]       |
| BG-1      | Dr. Korch, NIH         | Epithelial | N/A                       | Adherent   | ovarian carcinoma                   | [49]       |
| FHIOSE118 | Dr. Cheng , MOFFITT    | Epithelial | Normal cells              | Adherent   | normal cell line                    | [50]       |
| IOSE523   | Dr. Auersperg, UBC     | Epithelial | Normal cells              | Adherent   | normal cell line                    | [51]       |

**Additional file 1** – Ovarian cell lines that were used in this study
