# Supplementary material for: Kallikrein family proteases KLK6 and KLK7 are potential early detection and diagnostic biomarkers for serous and papillary serous ovarian cancer subtypes
Source: Springer Nature journal article supplement (doi:10.1186/s13048-014-0109-z), 2014-12-01
Supplement: MOESM2 [file 9778504]

| <b>Purpose and assays</b>                                                                                         | <b>Product</b>                                                              | <b>supplier</b>                                                                                                                                | <b># of arrays/ samples</b>                                                                                                                                                                                                                                                                                                                                                                                                                                                          |
|-------------------------------------------------------------------------------------------------------------------|-----------------------------------------------------------------------------|------------------------------------------------------------------------------------------------------------------------------------------------|--------------------------------------------------------------------------------------------------------------------------------------------------------------------------------------------------------------------------------------------------------------------------------------------------------------------------------------------------------------------------------------------------------------------------------------------------------------------------------------|
| Measuring KLKs expression on OVC tissue arrays compared to other types of cancer by qRT-PCR (Fig.2)               | The TissueScan Cancer Survey Panel                                          | Origene (Rockville, MD)                                                                                                                        | Over 390 cDNAs from OVC and 18 other types of cancer                                                                                                                                                                                                                                                                                                                                                                                                                                 |
| Measuring KLKs expression on different subtypes of OVC and in different grades of the disease by qRT-PCR (Fig. 3) | OVC cDNA panel I-IV                                                         | Origene (Rockville, MD)                                                                                                                        | 135 samples were evaluated for KLK6 expression and 142 samples were tested for KLK7 expression in 8 subtypes of OVCs. 116 were evaluated for KLK6 and 129 samples were tested for KLK7 expression in tissues taken from patients in 4 different grades of OVC. In addition, 134 samples were tested for KLK6 and 132 samples were evaluated for KLK7 expression in tissues taken from patients in 4 different stages of OVC. Numbers are further specified in parentheses in Fig. 3. |
| Measuring KLKs expression on OVC and normal ovarian tissue by ISH and IHC (Fig. 4)                                | 1) Whole-mount paraffin-embedded tissues<br>2) Tissue microarrays           | 1) Proteogenex (Culver City, CA) and the Tissue Bank of Thomas Jefferson University<br>2) US Biomax (Rockville, MD)                            | 1) Tissues from 10 normal and from 51 OVC patients.<br>2) Tissue arrays that contain 12 cases of ovarian cancer and 12 cancer adjacent normal ovary tissue .                                                                                                                                                                                                                                                                                                                         |
| Measuring KLKs expression on OVC and normal serum by Western Blotting (Fig. 5)                                    | 1) Ovarian tissue samples.<br>2) Serum samples from normal and OVC patients | 1) Tissue banks at MD Anderson Cancer Center and Thomas Jefferson University<br>2) Proteogenex (Culver City, CA) and Bioserve (Beltsville, MD) | 1) 16 normal ovarian tissue samples and 154 OVC tissues were tested. Numbers are further specified in Fig. 5a<br>2) Serum from 10 normal females and 44 OVC patients were tested                                                                                                                                                                                                                                                                                                     |
| Measuring CA125 and HE4 production by serum ELISA (Fig.6)                                                         | Serum samples from normal and OVC patients                                  | Proteogenex (Culver City, CA)                                                                                                                  | 19 serum samples from early stage OVC patients and 3 samples from normal individuals were evaluated                                                                                                                                                                                                                                                                                                                                                                                  |

**Additional file 2** – A detailed description of assays and samples that were used in this study
