# Supplementary material for: Kallikrein family proteases KLK6 and KLK7 are potential early detection and diagnostic biomarkers for serous and papillary serous ovarian cancer subtypes
Source: Springer Nature journal article supplement (doi:10.1186/s13048-014-0109-z), 2014-12-01
Supplement: MOESM3 [file 9778504]

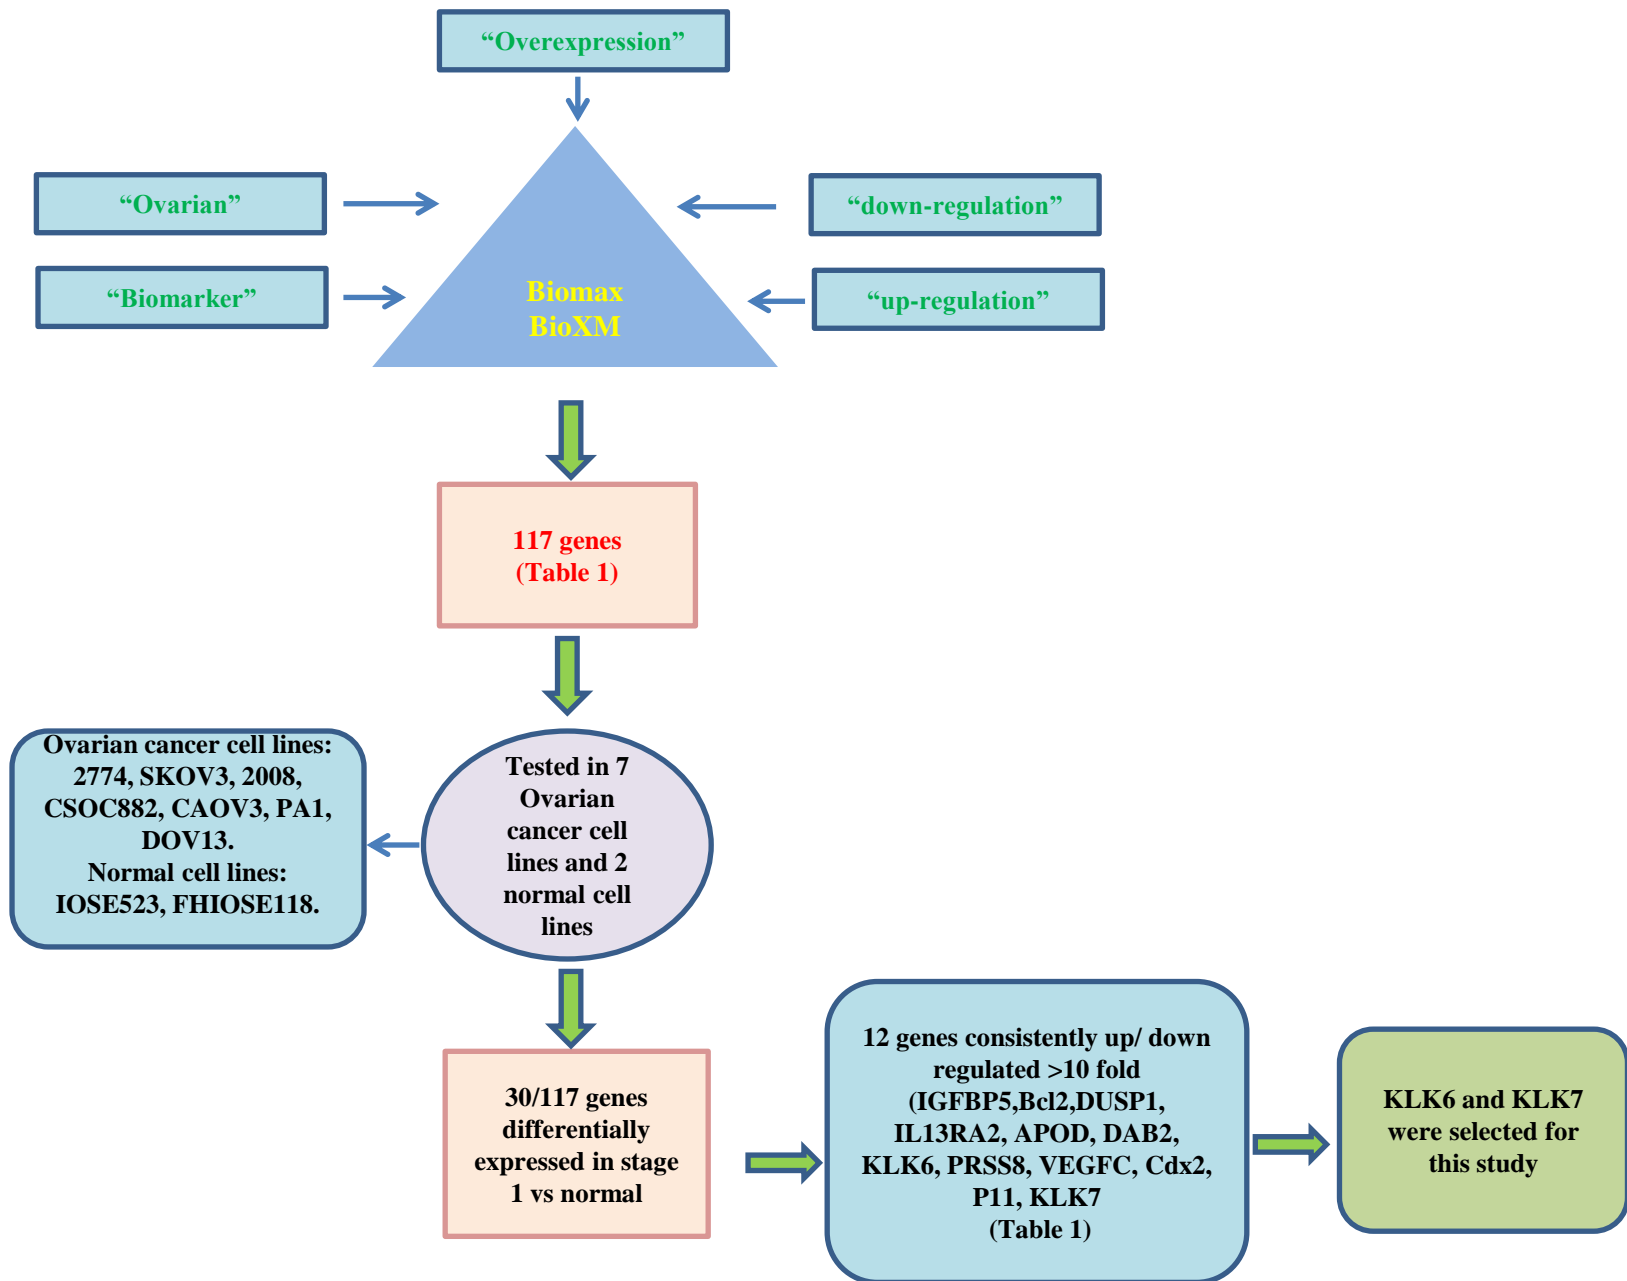

**Additional file 3** – A flowchart describing OVC biomarkers pre-screening process
